# Supplementary material
Source: HighWire-hosted journal article supplement (doi:10.1101/rna.073254.119)
Supplement: Supplemental_Figure_Legends.docx [file Supplemental_Figure_Legends.docx]

**Supplementary Figure Legends**

**Figure S1: RNA seq based expression analysis of** *linc02095***and *SOX9* in M1 and M3 cell lines**

(A-B). Illumina Sequencing in UCSC human genome browser showing increased levels of *linc02095* in M3 cells compared to M1 cells. The RNA seq data of the respective isoforms of *linc02095* (highlighted in red box) has been shown (C) Illumina Sequencing in UCSC human genome browser showing increased levels of *SOX9* (highlighted in red box) RNA in M3 cells compared to M1 cells. The *SOX9* bearing genomic region is highlighted in red boxes

**Figure S2: SOX9 localization in M3 cells**

M3 cells stained with SOX9 specific antibody (green) (Cat # AB-5535) and DAPI (blue) showing homogenous nuclear localization of SOX9.

**Figure S3: *Linc02095* is up-regulated in TNBC patient samples.**

(A). Data extracted from the Cancer RNA seq database based on 42 TNBC primary tumor samples as opposed to 21 normal tissues adjacent to the tumor from TNBC patients. Higher FPKM values are observed in the case of subset1 (TNBC) as compared to subset 2 (normal tissues from TNBC patients). The increased expression of two different transcripts of *linc02095* *(AC005152.3-001, AC005152.3-002)* is significant. Red color indicates high expression and blue indicates low expression. (B) Significant up-regulation of *linc02095* in basal breast cancer patients as opposed to normal like and other breast cancer subtypes like luminal A, luminal B, Her-2 (data extracted from TANRIC). The Y –axis represents the log2RPKM values. (C) *SOX9* expression data is generated from UALCAN ([http://ualcan.path.uab.edu/cgibin/TCGAExResultNew2.pl?genenam=SOX9&ctype=BRCA](http://ualcan.path.uab.edu/cgi-bin/TCGAExResultNew2.pl?genenam=SOX9&ctype=BRCA)). The expression data is based on TCGA data. The Y –axis represents the transcripts per million counts and the X-axis represents the tumor subtypes. (D-E).Relative expression analysis of *AC005152.3* and *SOX9* in BC molecular subtypes using GEPIA analysis

(<http://gepia.cancer-pku.cn/>.) (Z. Tang et al., 2017) software based on the TCGA and Genotype –Tissue Expression (GTEx) database using |logFC|≥1 and P≤0.05 as the cut-off criteria. The Y-axis represent s the log2 (TPM+1) expression values of the respective gene. Both *AC005152.3* and *SOX9* show significant increased expression in basal subtype of breast cancer.

**Figure S4: *Linc02095* regulates the expression of genes that are located in close genomic proximity.**

(A) UCSC genome browser showing relative positions of *linc02095* *(AC005152.3)* and neighboring genes (highlighted in red boxes) (B). Illumina Sequencing in UCSC human genome browser showing low expression level of *SOX9-AS1* (highlighted in red box) M1 and M3 cells. However, in M3 cells expression is higher as opposed to M1 cells. (C) Illumina Sequencing in UCSC human genome browser showing low expression level of *linc00511* (highlighted in red box) RNA in M1 and M3 cells. (D) Illumina Sequencing in UCSC human genome browser showing extremely low expression level of *linc01152*(highlighted in red box) RNA in M1 and M3 cells. (E) Bar graph showing significant up-regulation of *SOX9-AS1* and *linc001152* in *linc02095*-depleted cells. On the other hand, *linc00511* expression is not affected upon *linc02095* depletion. (F) Bar graph showing significant down-regulation of *SOX9-AS1* RNA level upon *SOX9*-KD. (G) Bar graph representing increased levels of *SOX9* mRNA as compared to scrambled knock down in M3 cells. Prominent decrease in *SOX9* mRNA levels were observed on *linc02095KD* as compared to control and *SOX9-AS1*-depleted cells. *SOX9-AS1* KD in *linc02095*-depleted cells did not rescue the expression of *SOX9*. Data (E-G,) represent mean ±SD of three independent experiments. P-values (*P<0.05, ***P<0.01) were obtained by using Student ’s t-test.

**Figure S5: Depletion of *linc02095* or SOX9 result in reduced tumorigenicity.**

(A) BrdU-PI flow cytometry analysis of *linc02095* depleted cells showed slower S-pahse progression. (B)Anchorage independent growth assay in control, *linc02095* and *SOX9* shRNA-treated M3 cells.

**Figure S6**: Immuno-blot to detect SOX9 from input, SOX9 or IgG ChIP extracts.

**Figure S7: Nuclear and cytoplasmic distribution of *linc02095* on overexpression**

(A) Bar graph showing increase in both nuclear and cytoplasmic pool of *linc02095* upon it transient overexpression in M3 cells.

**Figure S8: Expression Correlation of *linc02095(AC005152.3)* and *SOX9* in breast cancer patient samples.**

Data has been generated from GEPIA (<http://gepia2.cancer-pku.cn/#correlation>). *SOX9* showed positive correlation with *linc02095.*

**Figure S9: *Linc02095* gene body and promoter show chromatin marks associated with enhancer elements.**

UCSC genome browser view of *linc02095* genomic locus. Please note enhanced H3K4Me1 and H3K27Ac marks across the gene body in GM12878 and H1-hESC cells. Red box indicates regions within *linc02095* that show conservation in primates and not in other vertebrates.
