# Supplementary material
Source: HighWire-hosted journal article supplement (doi:10.1101/rna.073254.119)
Supplement: Supplemental_Figures.pdf [file Supplemental_Figures.pdf]

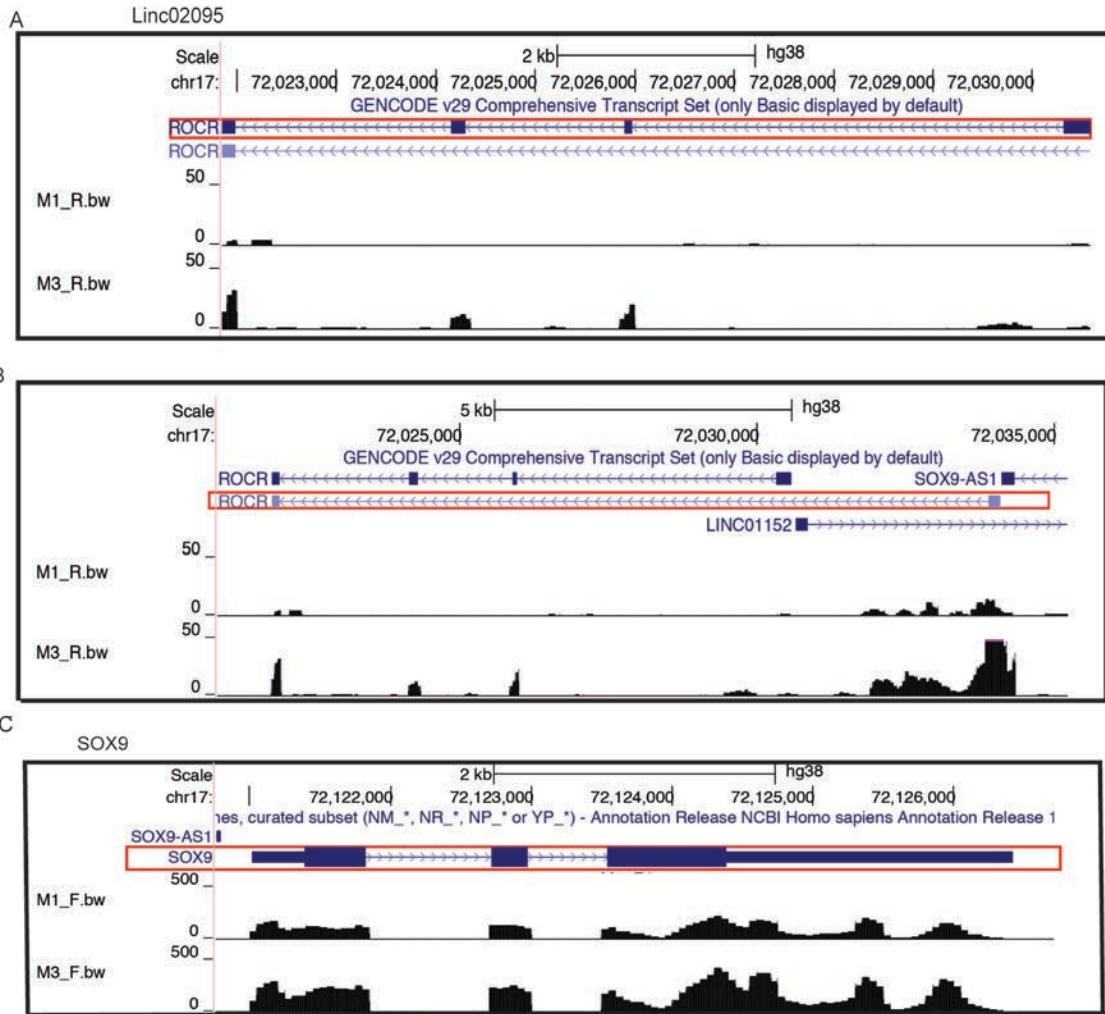

Supplementary Figure S1

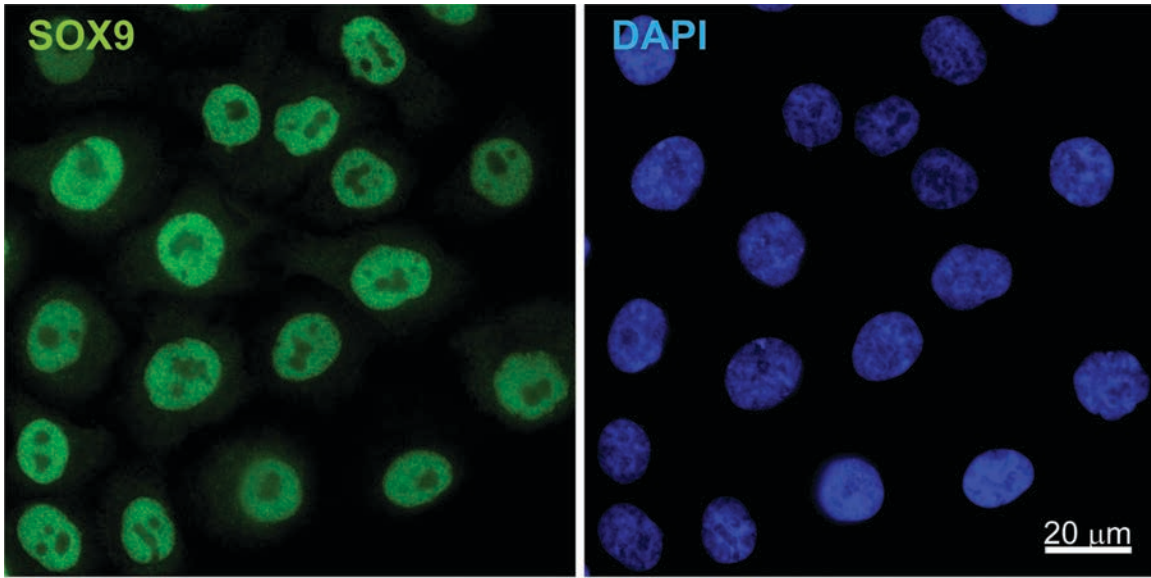

Supplementary Figure S2

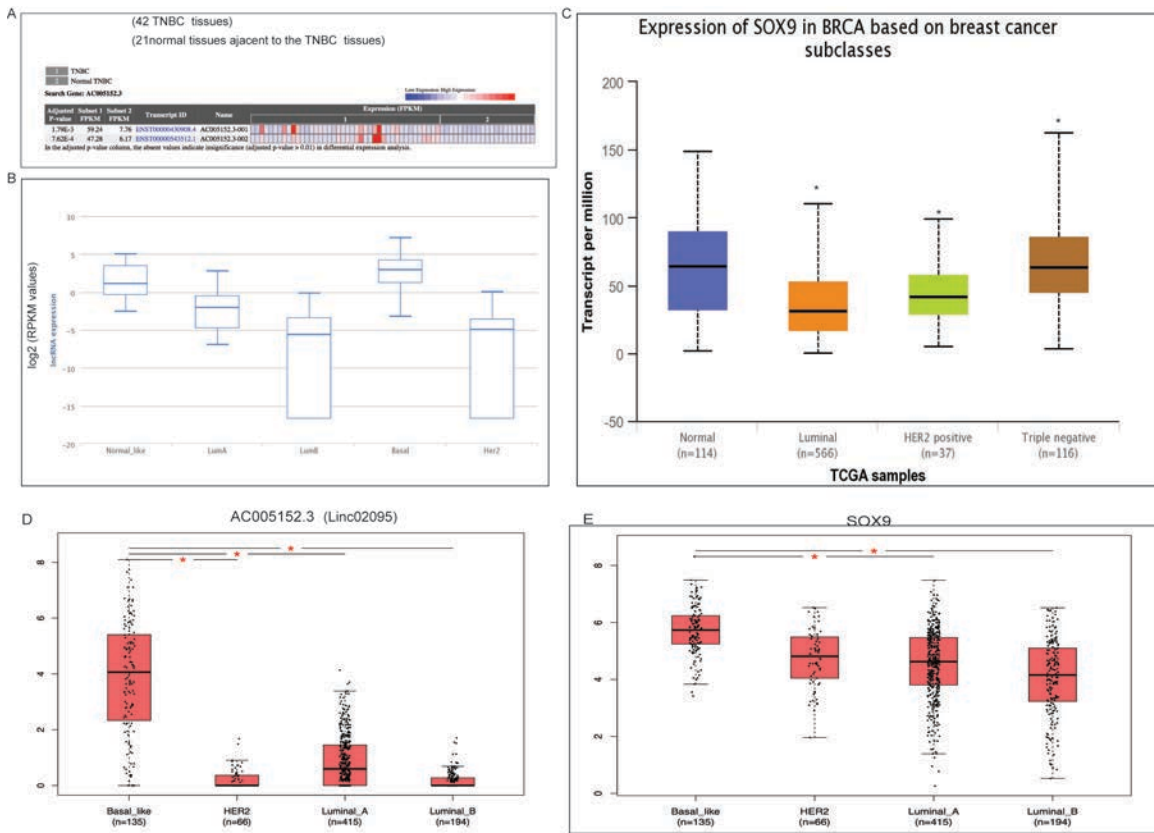

Supplementary Figure S3

A Supplementary Figure S4

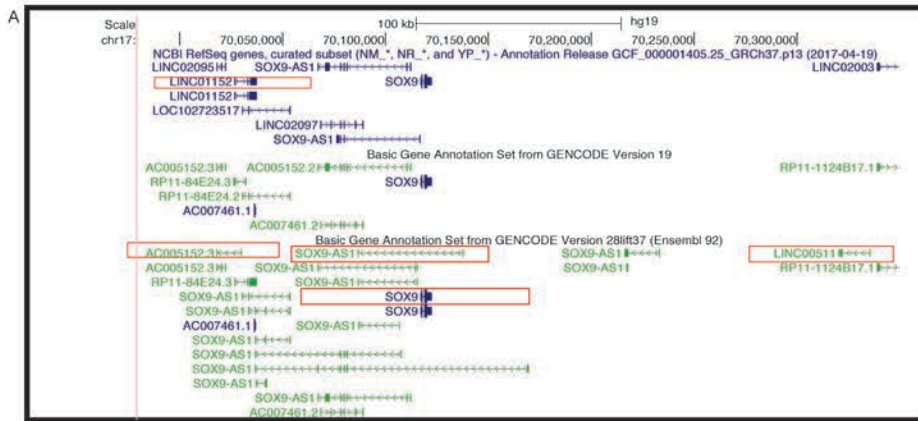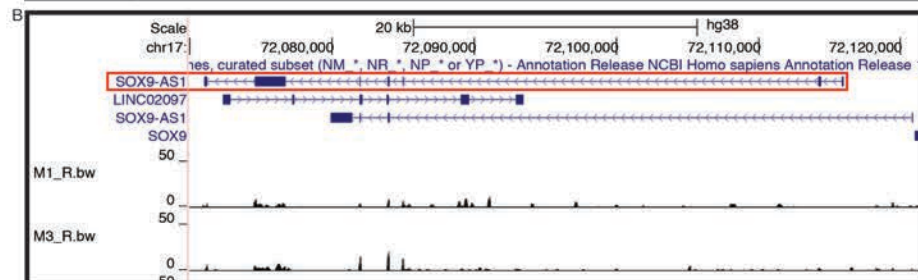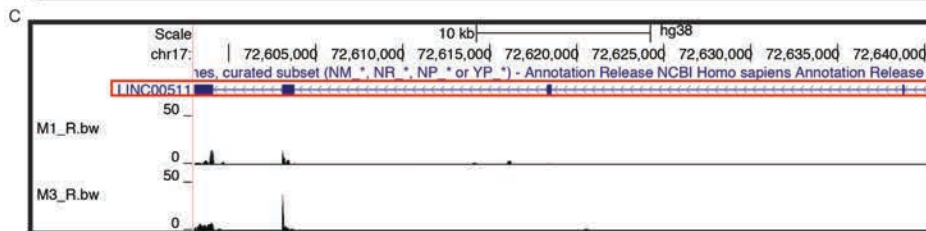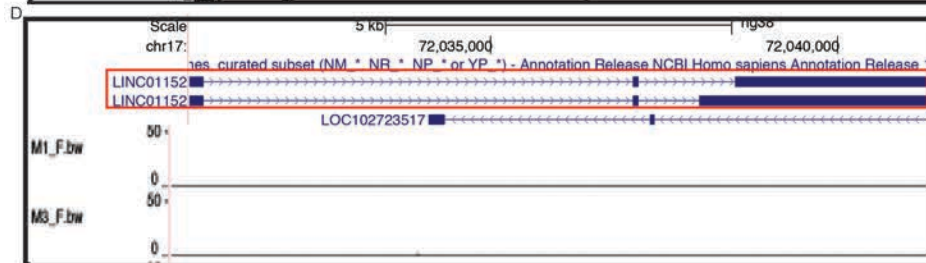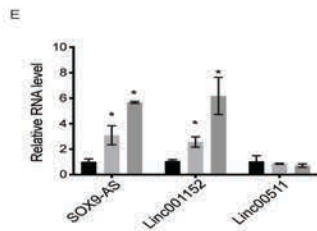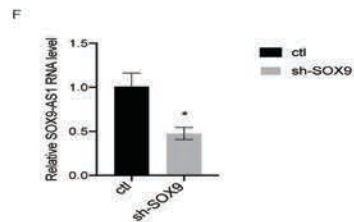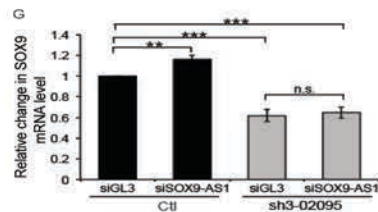

Supplementary Figure S4

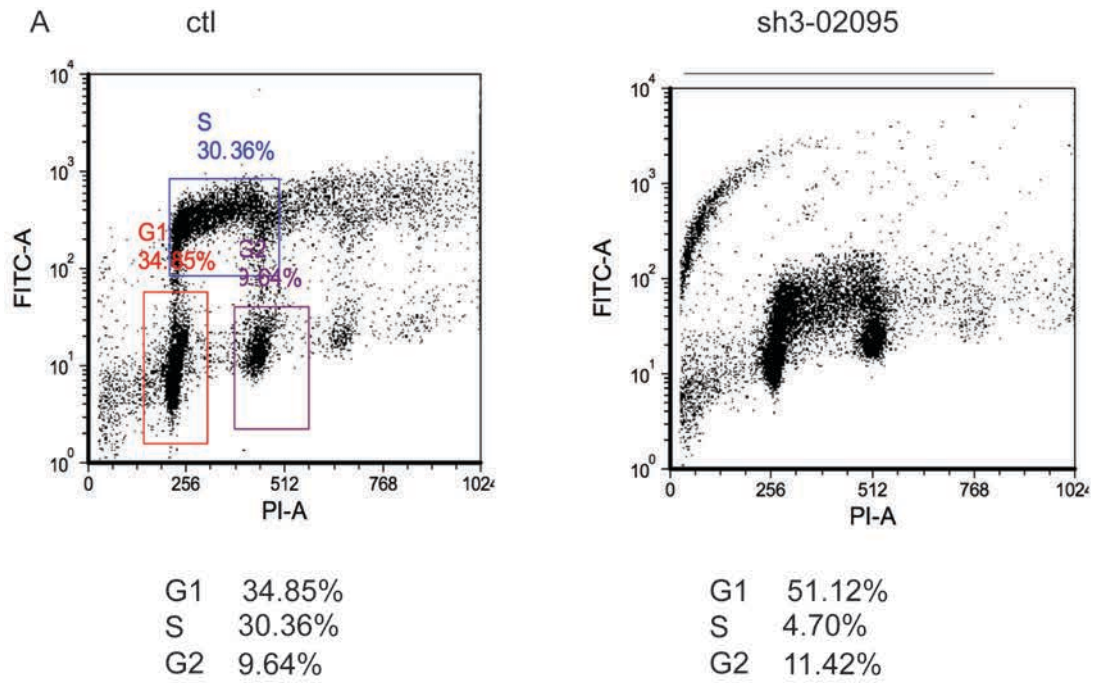

Anchorage independent growth Assay

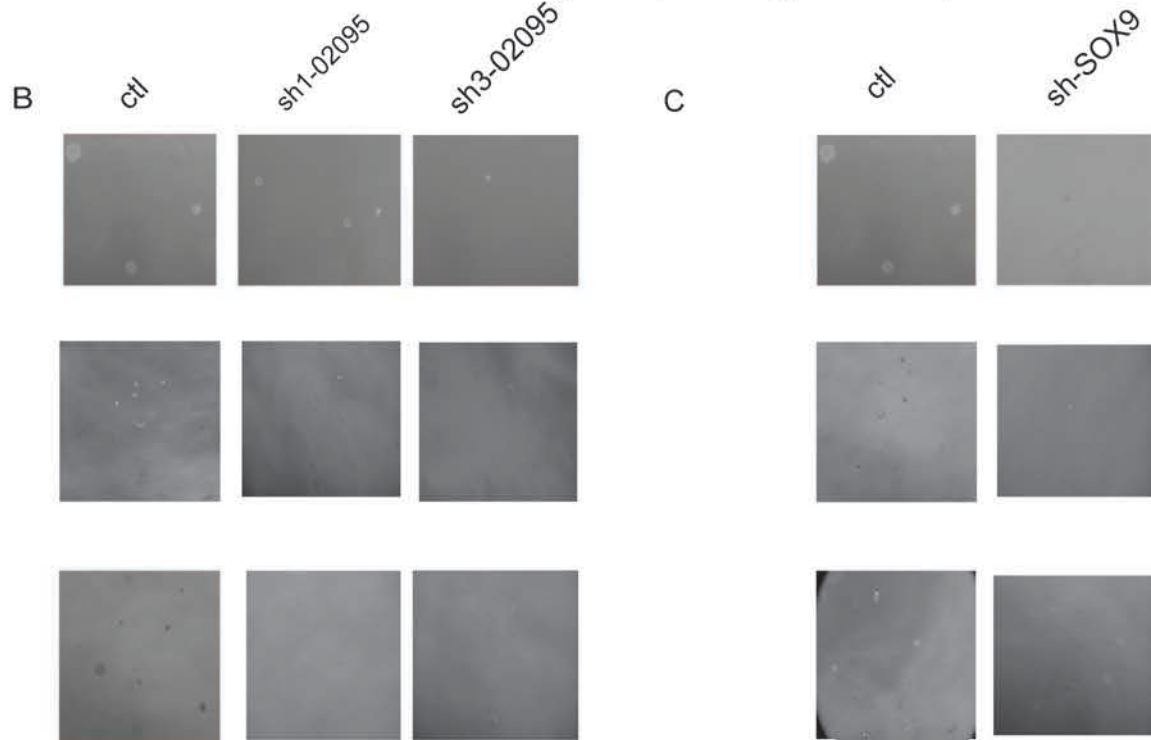

Supplementary Figure S5

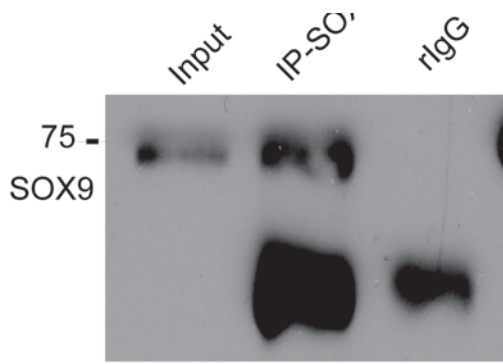

Supplementary Figure-S6

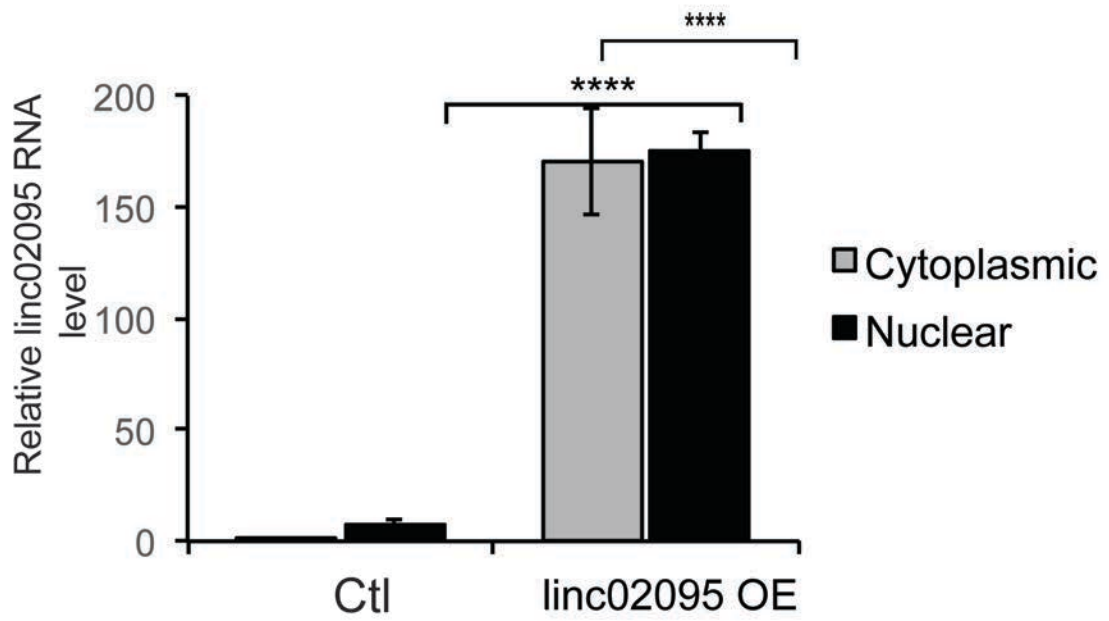

Supplementary Figure S7

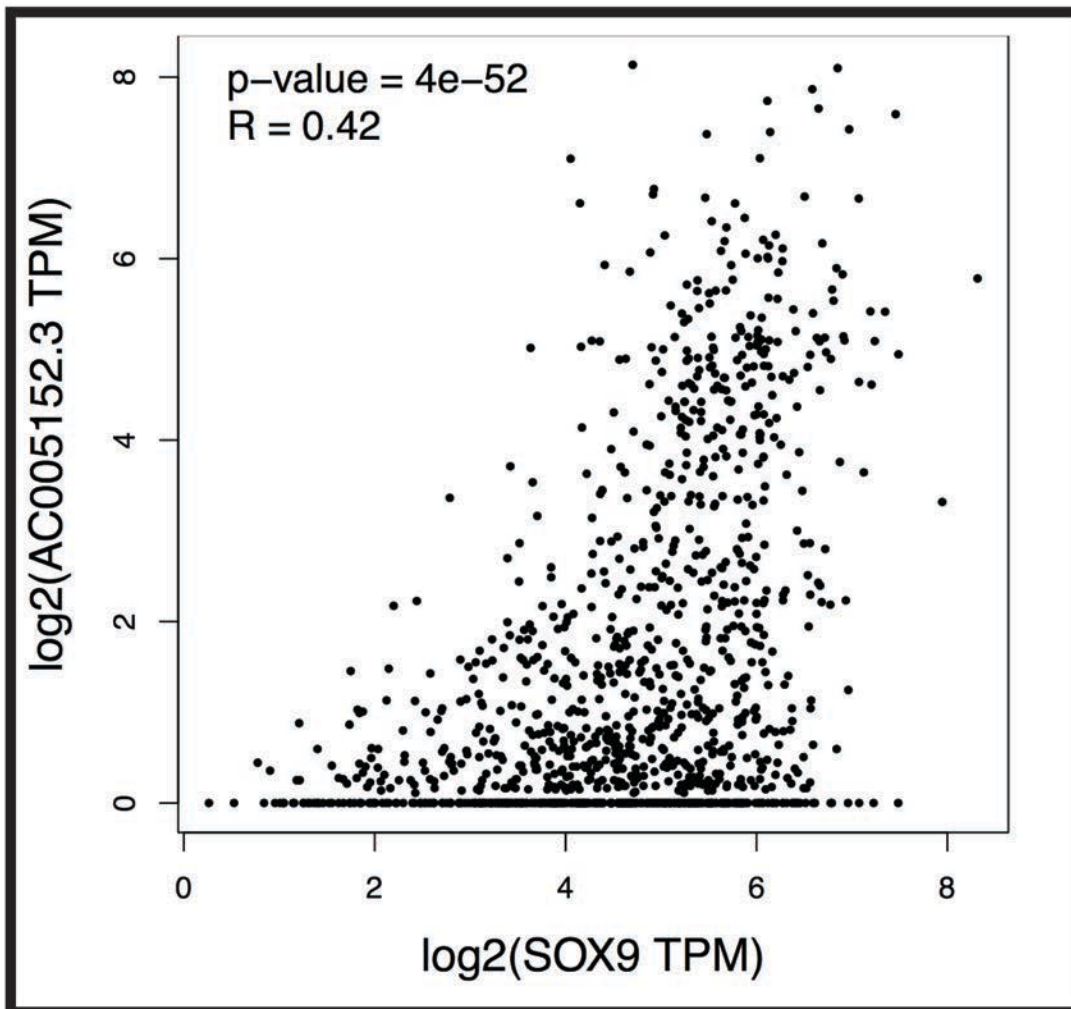

Supplementary Figure S8

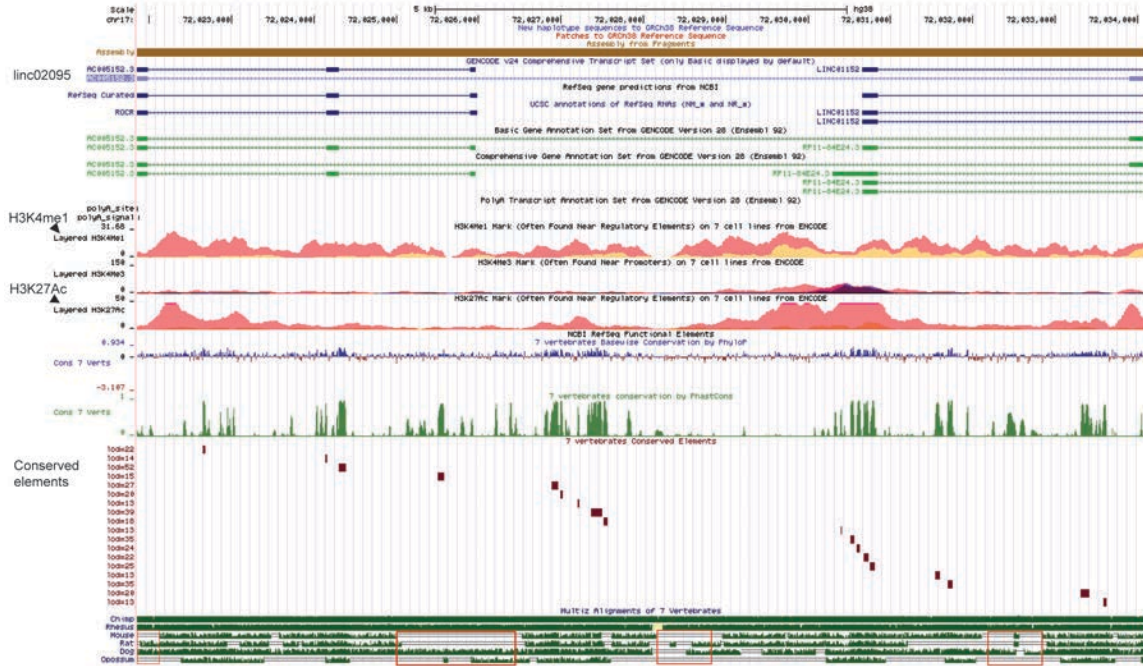

Supplementary Figure S9
